# Supplementary material for: What is the effect of Sn and Mo oxides on gold catalysts for selective oxidation of benzyl alcohol?
Source: Royal Society of Chemistry journal article supplement (doi:10.1039/c8nj05642k), 2019-01-01
Supplement: c8nj05642k1.pdf [file c8nj05642k1.pdf]

ESI

## What is the Effect of Sn and Mo oxides on Gold Catalyst for Selective Oxidation of Benzyl Alcohol ?

Jing Xu,<sup>a</sup> Yue Wang,<sup>b</sup> Yunxiang Cao,<sup>b</sup> Zhengke He,<sup>b</sup> Lianming Zhao,<sup>a</sup>

Ubong Jerome Etim,<sup>b</sup> Peng Bai,<sup>b</sup> Zifeng Yan,<sup>b</sup> Pingping Wu<sup>b \*</sup>

<sup>a</sup> State Key Laboratory of Heavy Oil Processing, School of Materials Science and Engineering, Institute of Advanced Materials, China University of Petroleum (East China), Qingdao, Shandong 266580, People's Republic of China.

<sup>b</sup> State Key Laboratory of Heavy Oil Processing, Key Laboratory of Catalysis, College of Chemical Engineering, China University of Petroleum (East China), Qingdao 266580, China

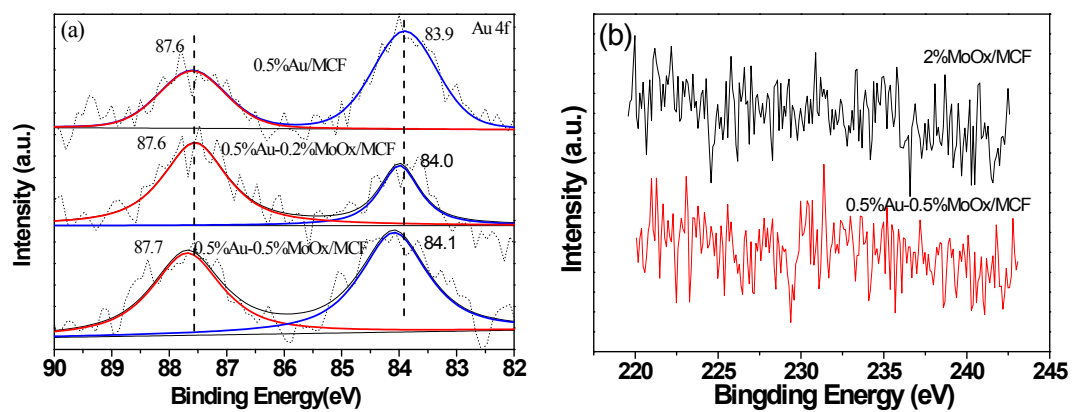

Fig. S1 (a) Au 4f and (b) Mo 3d XPS spectra of samples 0.5%Au/MCF, 0.5%Au-0.2%MoO<sub>x</sub>/MCF, 0.5%Au-0.5%MoO<sub>x</sub>/MCF and 2%MoO<sub>x</sub>/MCF.

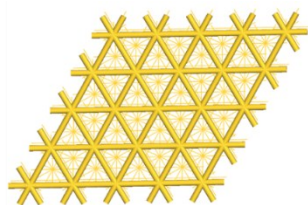

Au(111) (top view)

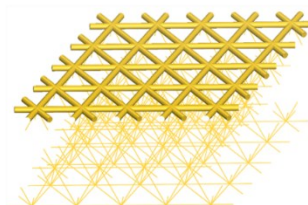

Au (111) (side view)

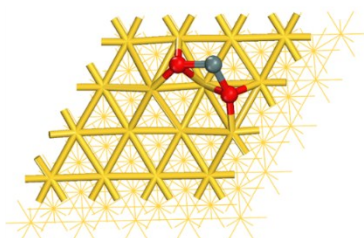

SnO<sub>2</sub>/Au(111) (top view)

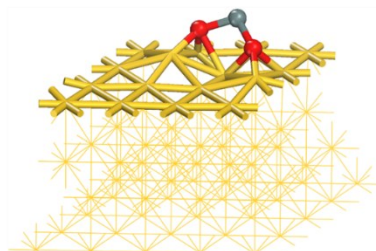

SnO<sub>2</sub>/Au (111) (side view)

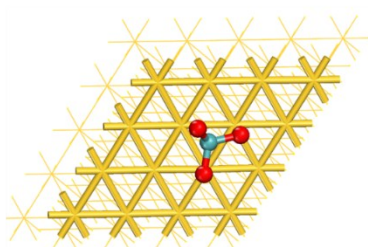

MoO<sub>3</sub>/Au(111) (top view)

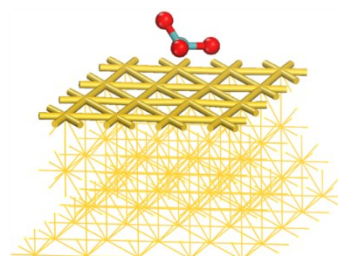

MnO<sub>3</sub>/Au (111) (side view)

Fig. S2 Optimized geometries of Au(111), SnO<sub>2</sub>/Au(111), and MoO<sub>3</sub>/Au(111). Yellow, gray, cambridge blue, and red denote Au, Sn, Mo, and O atoms, respectively.

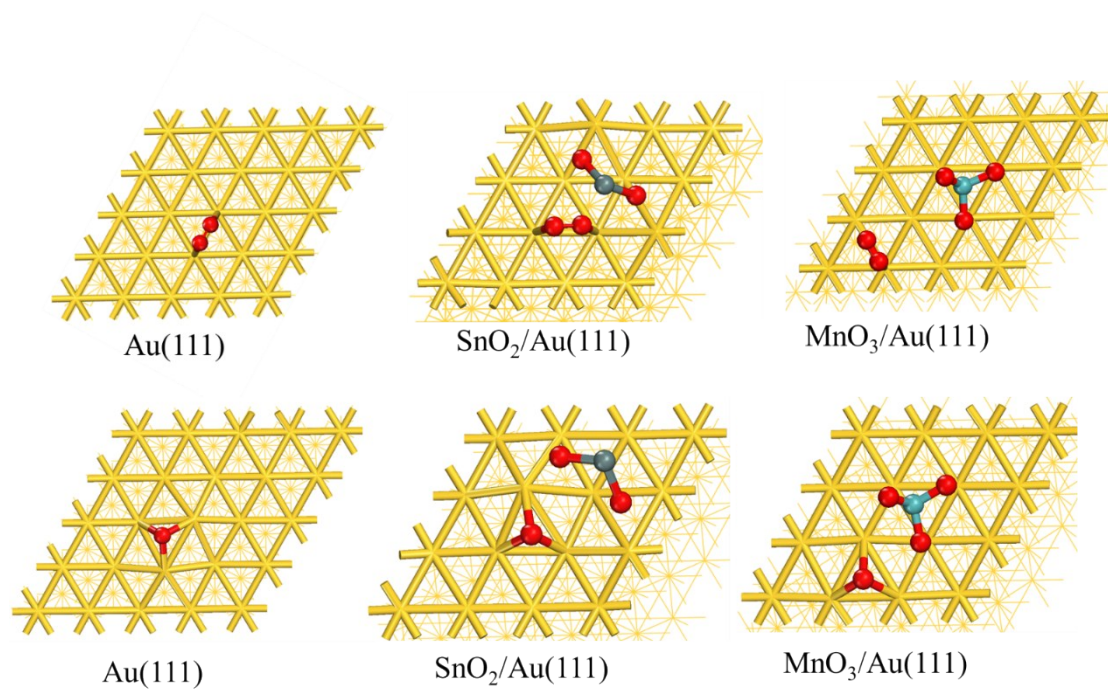

Fig. S3 The most stable adsorption configurations of  $O_2$  and  $O$  on Au(111),  $SnO_2/Au(111)$ , and  $MoO_3/Au(111)$ . Yellow, gray, cambridge blue, and red denote Au, Sn, Mo, and O atoms, respectively.

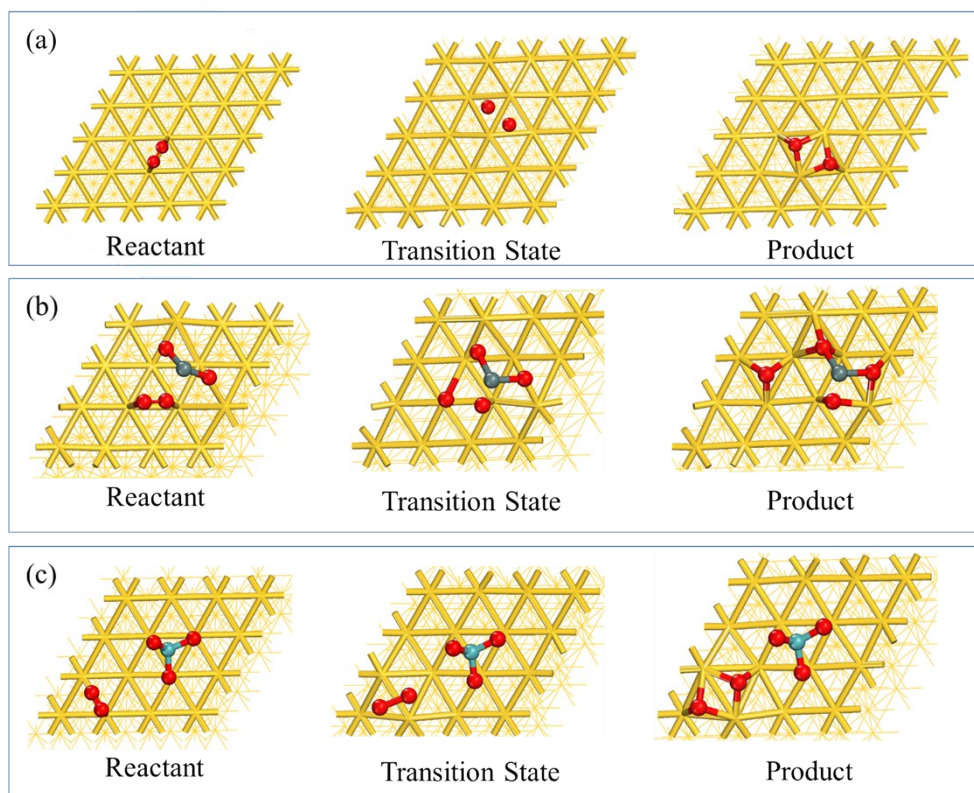

Fig. S4 Dissociation of  $\text{O}_2$  on (a)  $\text{Au}(111)$ , (b)  $\text{SnO}_2/\text{Au}(111)$ , and (c)  $\text{MoO}_3/\text{Au}(111)$ . Yellow, gray, cambridge blue, and red denote Au, Sn, Mo, and O atoms, respectively.
